# Supplementary material
Source: PubMed Central journal article supplement (PMC4702233)
Supplement: CJN.05210515_CJN05210515SupplementaryData1.pdf [file CJN.05210515_CJN05210515SupplementaryData1.pdf]

Tej K. Mattoo, MD, DCH, FRCP (UK): Nephrology and Hypertension, Children's Hospital of Michigan, Wayne State University School of Medicine, Detroit, MI

Russell W. Chesney, MD: Department of Pediatrics, University of Tennessee Health Sciences Center, Memphis, TN

Saul P. Greenfield, MD: Division of Pediatric Urology, Women & Children's Hospital of Buffalo, State University of New York at Buffalo School of Medicine, Buffalo, NY

Alejandro Hoberman, MD: Department of Pediatrics, University of Pittsburgh School of Medicine, Children's Hospital of Pittsburgh of University of Pittsburgh Medical Center, Pittsburgh, PA

Ron Keren, MD, MPH: Department of Pediatrics, Children's Hospital of Philadelphia, Philadelphia, PA

Ranjiv Mathews, MD: Department of Urology, Johns Hopkins School of Medicine, Baltimore, MD

Lisa Gravens-Mueller, MS: Department of Biostatistics, University of North Carolina at Chapel Hill, Chapel Hill, NC

Anastasia Ivanova, PhD: Department of Biostatistics, University of North Carolina at Chapel Hill, Chapel Hill, NC

Myra A. Carpenter, PhD: Department of Biostatistics, University of North Carolina at Chapel Hill, Chapel Hill, NC

Marva Moxey-Mims, MD: National Institute of Diabetes and Digestive and Kidney Diseases, National Institutes of Health, Bethesda, MD

Massoud Majd, MD: Department of Radiology, Children's National Medical Center, Washington, DC

Harvey A. Ziessman, MD: Division of Nuclear Medicine, Russell H. Morgan Department of Radiology and Radiological Sciences, The Johns Hopkins University, Baltimore, MD

For the RIVUR Trial Investigators
