# Supplementary material
Source: PubMed Central journal article supplement (PMC4702233)
Supplement: CJN.05210515_CJN05210515SupplementaryData2.pdf [file CJN.05210515_CJN05210515SupplementaryData2.pdf]

## Supplemental Figures

Supplement Figure 1: Kidney segments for DMSA renal scan interpretation

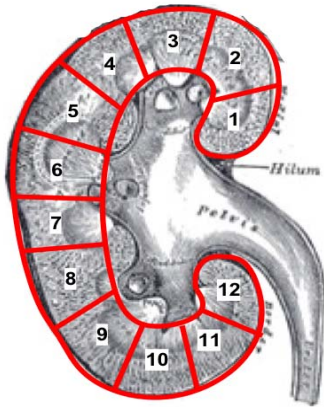

**Supplement Figure 2: Details on the number of renal units with scarring**

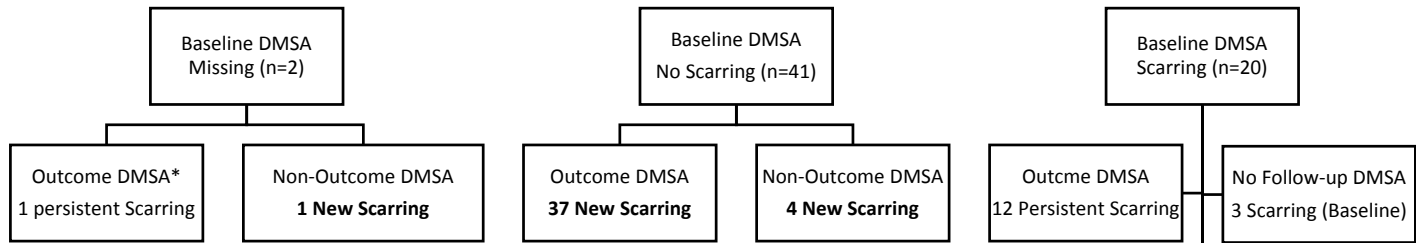

**Definitions**

- Baseline scan: Within 2 weeks of randomization and  $\leq 112$  days from index UTI
- Outcome scan: Within 10 days of study exit visit at 24 months following randomization.
- Non-Outcome scan: scan done outside the “outcome scan” window
- Persistent scarring: Scarring diagnosed in first renal scan (baseline or otherwise) that persisted in follow-up scans

**Renal units with scarring**

- Number of renal units with any scarring: 63
- Number of renal units with new scarring (in bold): 43
- One renal unit with no baseline scan had persistent scarring on visits 4, 7 and 13 (\*)
- One renal unit had scarring at baseline and follow-up scans as well as new scarring in the outcome scan (#)
